# Supplementary material
Source: PubMed Central journal article supplement (PMC8053941)

## Supplementary Figure legends

**Supplementary Figure S1. Integrated analysis of promoter methylation and protein expression of STING and cGAS in human melanoma cell lines.** Methylation levels of *STING* (A) and *cGAS* (B) in 16 human melanoma cell lines were assessed by whole-genome methylation profiling using Illumina MethylationEPIC BeadChip microarray. Methylation levels for *STING* (18 probes) and *cGAS* (8 probes) are presented as  $\beta$ -values ranging from 0 to 1. Each melanoma cell line is presented by a unique marker. Colored lines below show the probes position in the gene, where TSS1500 (yellow) and TSS200 (purple) indicate 1500 and 200 base-pairs upstream of the transcription site, respectively. Column plots above represent the correlation ( $r$ ) between the  $\beta$ -value in each probe and the protein expression (blue: negative correlation; red: positive correlation).

**Supplementary Figure S2. Genetic depletion of DNMT1 and DNMT3B in WM1361A melanoma cell line results in re-expression of STING.** Immunoblot analysis of STING, DNMT1 and DNMT3B expression in WM1361A melanoma cell line transfected with siRNA targeting DNMT1 (si-DNMT1), DNMT3B (si-DNMT3B) or control siRNA (si-Control) **(A)**. Ratio of total STING relative to  $\beta$ -actin in indicated cell lines quantified using ImageJ software **(B)**.

**Supplementary Figure S3. CXCL10 and IFN- $\beta$  expression in WM266-4, SBCL-2 and 888-MEL melanoma cell lines.** WM266-4, SBCL-2 and 888-MEL with or without 5AZADC pretreatment were stimulated with 2'3'-cGAMP for 24 h. CXCL10 **(A)** and IFN- $\beta$  **(B)** levels in cell culture supernatants were measured using ELISA. Data represent mean  $\pm$  SD for two or three biological replicates.

**Supplementary Figure S4. Intact activation of STING signaling is required for dsDNA-induced upregulation of MHC class I.** Representative histograms **(A)** and mean fluorescence intensity (MFI) **(B)** of HLA-A.B.C expression on 526-MEL cells (with or without 5AZADC pretreatment) following stimulation with dsDNA for 24 h. Data represent mean  $\pm$  SD for three biological replicates.

# Supplementary Figure 1.

**A**

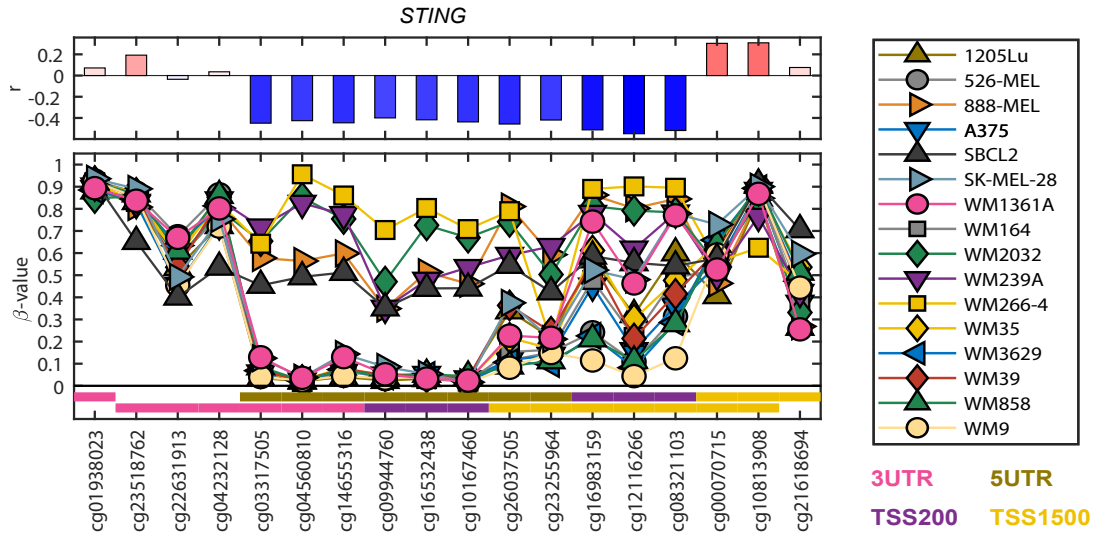

**B**

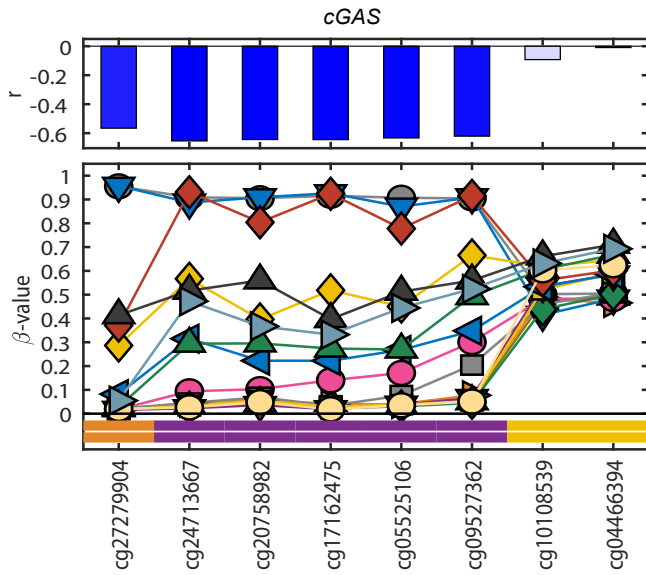

**Supplementary Figure 2.**

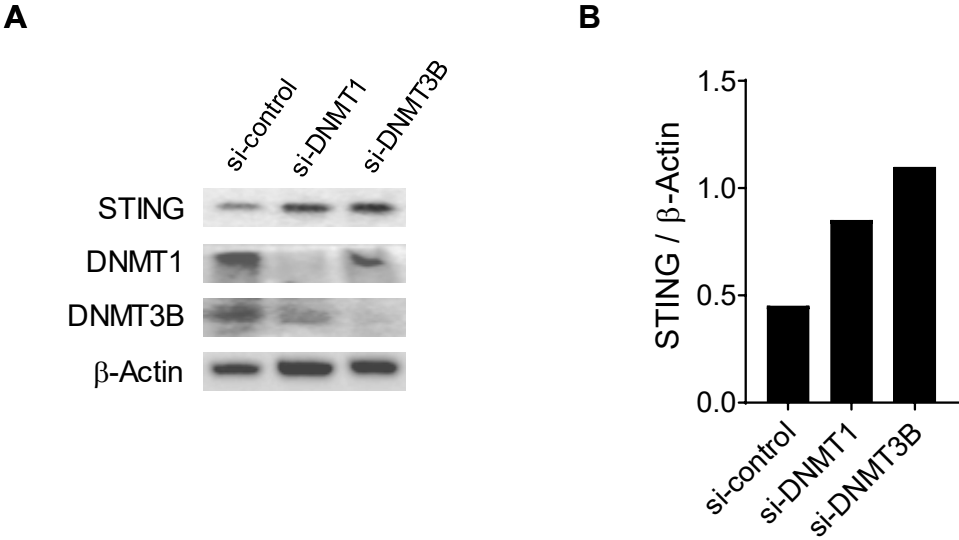

# Supplementary Figure 3.

**A**

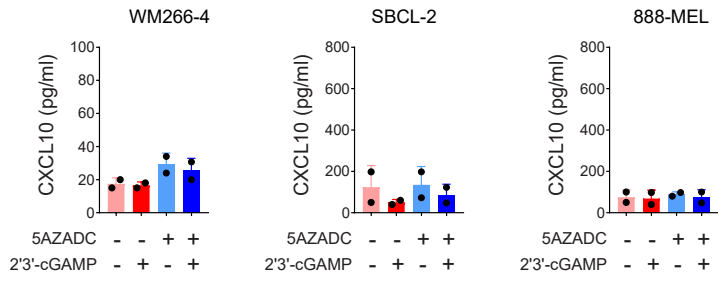

**B**

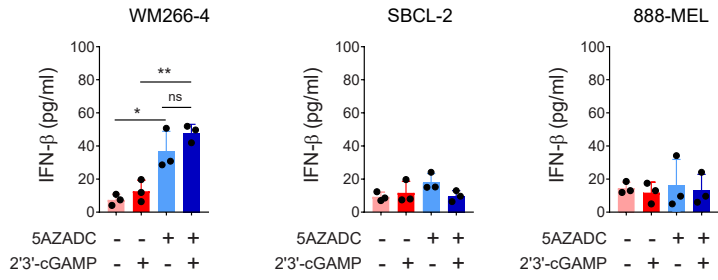

Supplementary Figure 4.

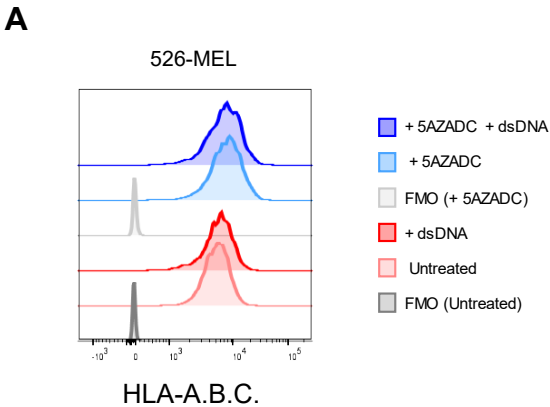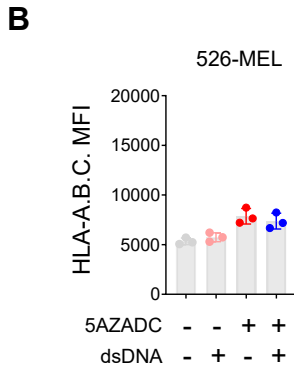

Supplement: pnas.2013598118.sapp.pdf [file pnas.2013598118.sapp.pdf]
